# Supplementary material
Source: PubMed Central journal article supplement (PMC3406517)
Supplement: supp_sbq150_szbltn-art-10-0329-File005.pdf [file supp_sbq150_szbltn-art-10-0329-File005.pdf]

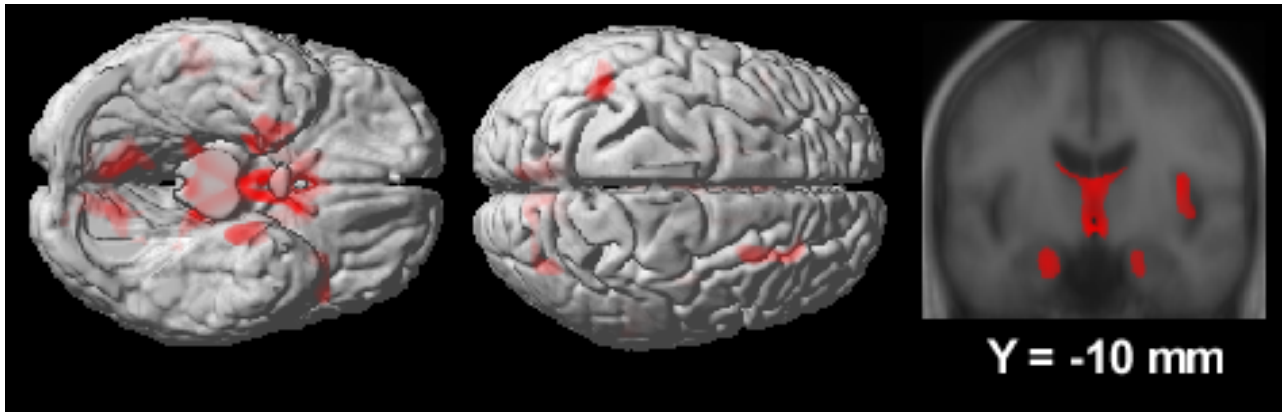

| Brain region                                  | Brodmann's area (BA) | p (FDR-corr) | Z score | x y z coordinates |     |     | Cluster volume (cc) |
|-----------------------------------------------|----------------------|--------------|---------|-------------------|-----|-----|---------------------|
|                                               |                      |              |         | x                 | y   | z   |                     |
| Thalamus/caudate nuclei (head) (R/L)          |                      | 0.001        | 5.6     | -4                | -1  | -10 | 20.1                |
| Inferior parietal sulcus (L)                  | 40/7                 | 0.015        | 5.07    | -41               | -49 | 52  | 1.5                 |
| Insula (R)                                    |                      | 0.019        | 5.02    | 39                | -12 | 10  | 1.1                 |
| Cuneus (L)                                    | 18                   | 0.05         | 4.83    | -6                | -73 | 22  | 8.6                 |
| Intermediate cerebellar lobule (L)            |                      | 0.09         | 4.65    | -23               | -59 | -24 | 3.3                 |
| Medial frontal gyrus                          | 6                    | 0.09         | 4.65    | 30                | 16  | 55  | 1.3                 |
| Intermediate cerebellar lobule (R)            |                      | 0.1          | 4.59    | 23                | -59 | -24 | 5.9                 |
| Hippocampal uncus (L)                         |                      | 0.2          | 4.42    | -20               | -6  | -28 | 1.5                 |
| Hippocampal uncus / parahippocampal gyrus (R) | 38                   | 0.3          | 4.35    | 25                | 4   | -40 | 2.1                 |
| Superior temporal sulcus (R)                  | 21                   | 0.3          | 4.29    | 52                | -32 | -5  | 1.2                 |
| Inferior frontal gyrus (L)                    | 45/47                | 0.4          | 4.23    | -31               | 21  | 2   | 1.2                 |

**Additional material n°1**
